# Supplementary material for: The deubiquitinase Ubp3/Usp10 constrains glucose-mediated mitochondrial repression via phosphate budgeting
Source: eLife journal article supplement (doi:10.7554/elife.90293), 2023-11-03

Figure 2-figure supplement 1B-Pfk1, Tdh2 and Tdh3 levels in WT and ubp3 cells with/without MG132

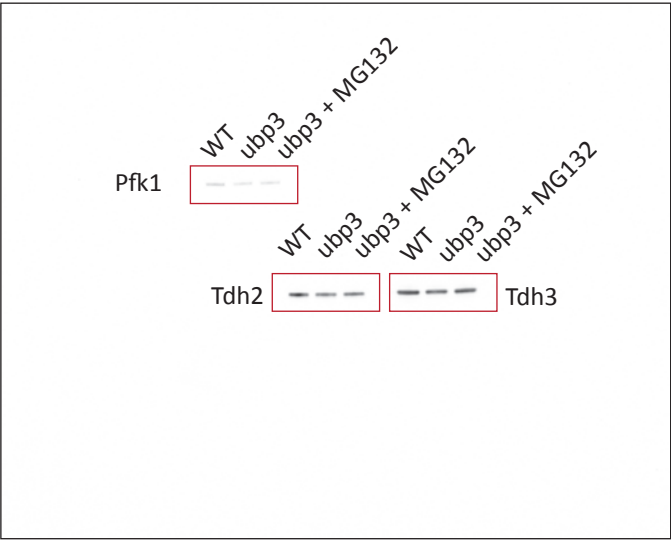

High exposure

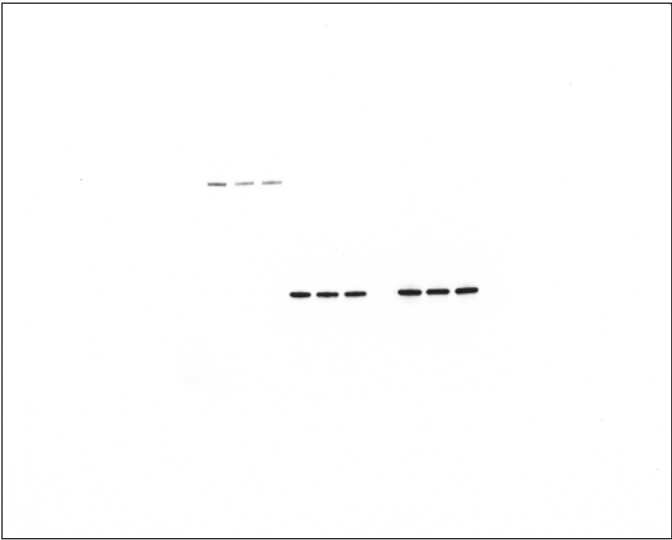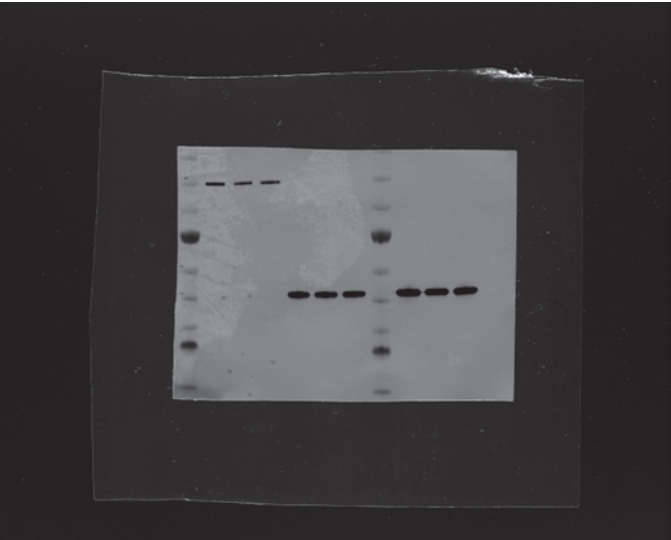

Loading

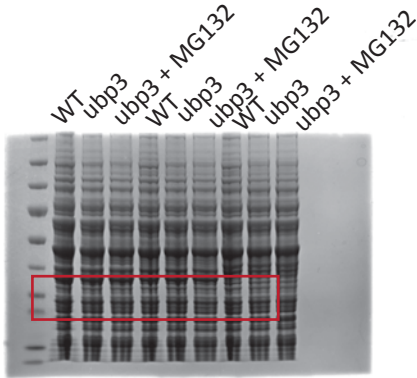

Supplement: fig3-figsupp3-data3 [file elife-90293-fig3-figsupp3-data3-v1.zip]
