# Supplementary material for: The deubiquitinase Ubp3/Usp10 constrains glucose-mediated mitochondrial repression via phosphate budgeting
Source: eLife journal article supplement (doi:10.7554/elife.90293), 2023-11-03
Supplement: fig4-data1 [file elife-90293-fig4-data1-v1.zip]

Figure 4C and 4E-Cox 2 levels in WT,*ubp3Δ* and *tdh2Δtdh3Δ* cells

Loading control

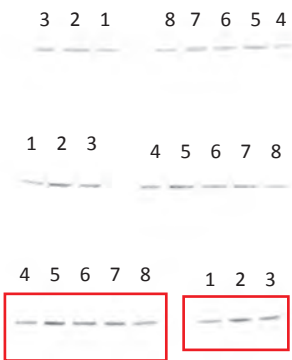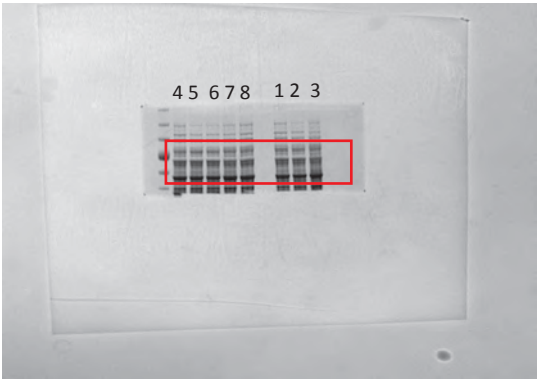

1-WT, 2- *ubp3Δ*, 3 - *tdh2Δtdh3Δ*, 4- WT, 5-*ubp3Δ*, 6- *ubp3Δ*-Pi, 7-*tdh2Δtdh3Δ*, 8-*tdh2Δtdh3Δ*-Pi
