# Supplementary material for: The deubiquitinase Ubp3/Usp10 constrains glucose-mediated mitochondrial repression via phosphate budgeting
Source: eLife journal article supplement (doi:10.7554/elife.90293), 2023-11-03
Supplement: fig5-figsupp5-data5 [file elife-90293-fig5-figsupp5-data5-v1.zip]

**Figure 4-Figure supplement 1A - Porin, Cox2, Idh1 and Vph1 in isolated mitochondria**

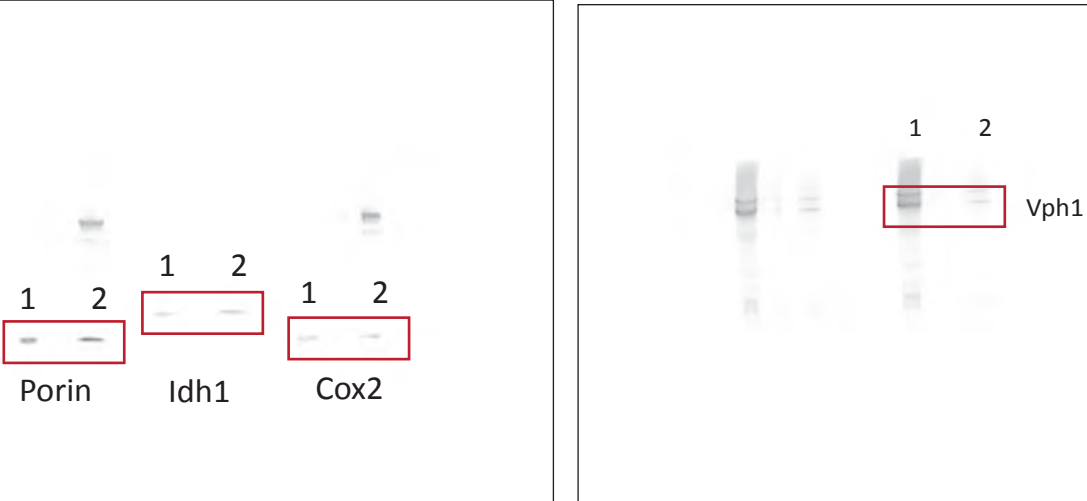

1-Lysate, 2- Isolated mitochondria
