# Supplementary material for: The deubiquitinase Ubp3/Usp10 constrains glucose-mediated mitochondrial repression via phosphate budgeting
Source: eLife journal article supplement (doi:10.7554/elife.90293), 2023-11-03

Figure 4-Figure supplement 1A Eno1 and Cox2 in cytosolic fraction

1-WT, 2- WT+Pi, 3- *ubp3Δ*

Lysate

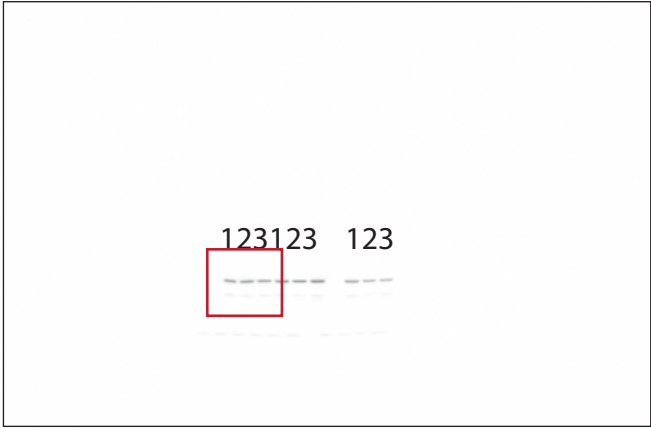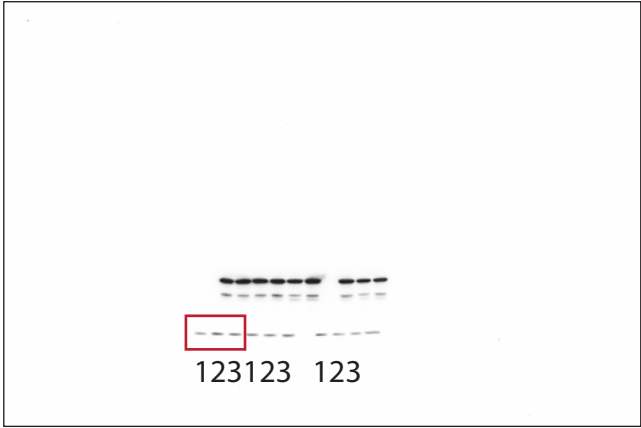

Cytosolic fraction

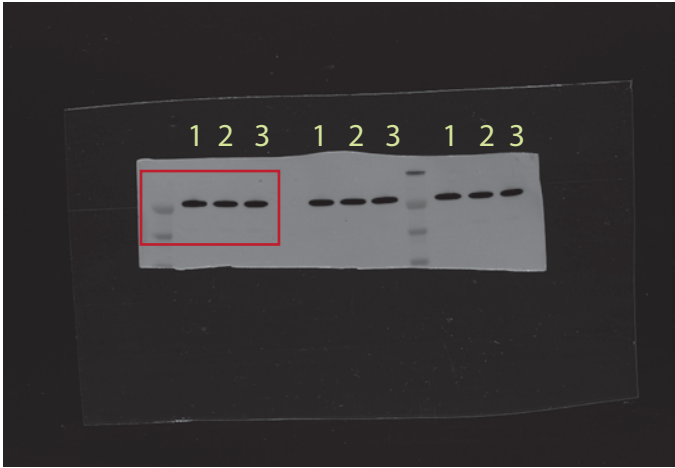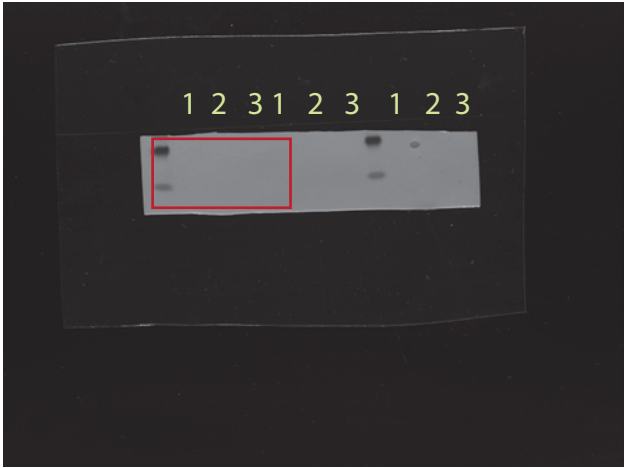

Supplement: fig5-figsupp5-data5 [file elife-90293-fig5-figsupp5-data5-v1.zip]
