# Supplementary figures and images for: The deubiquitinase Ubp3/Usp10 constrains glucose-mediated mitochondrial repression via phosphate budgeting
Source: eLife journal article supplement (doi:10.7554/elife.90293), 2023-11-03

Figure 1E-Cox2 levels in WT and *ubp3Δ* cells

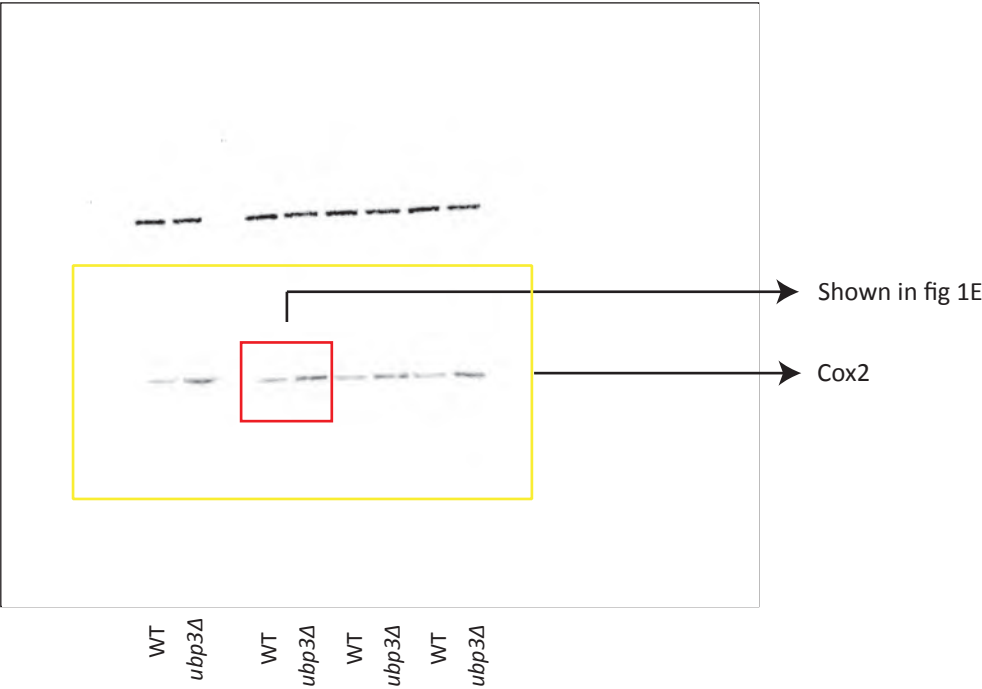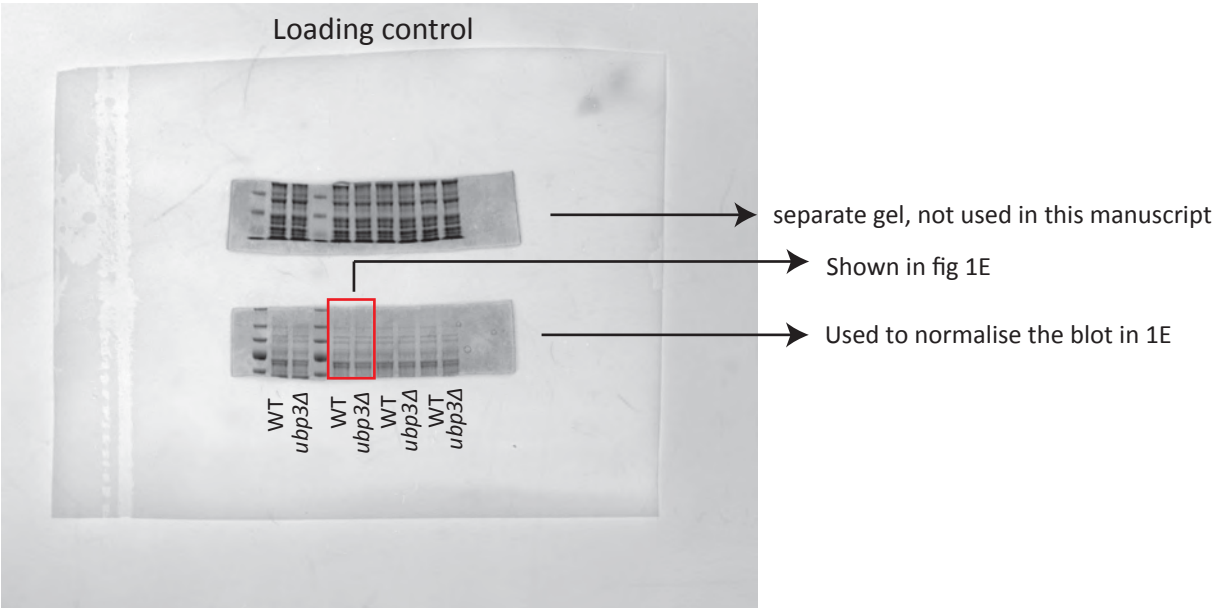

Supplement: fig1-data1 [file elife-90293-fig1-data1-v1.zip]

Figure 1-figure supplement 1E-Ubp3 levels in WT and Ubp3<sup>C469A</sup> cells

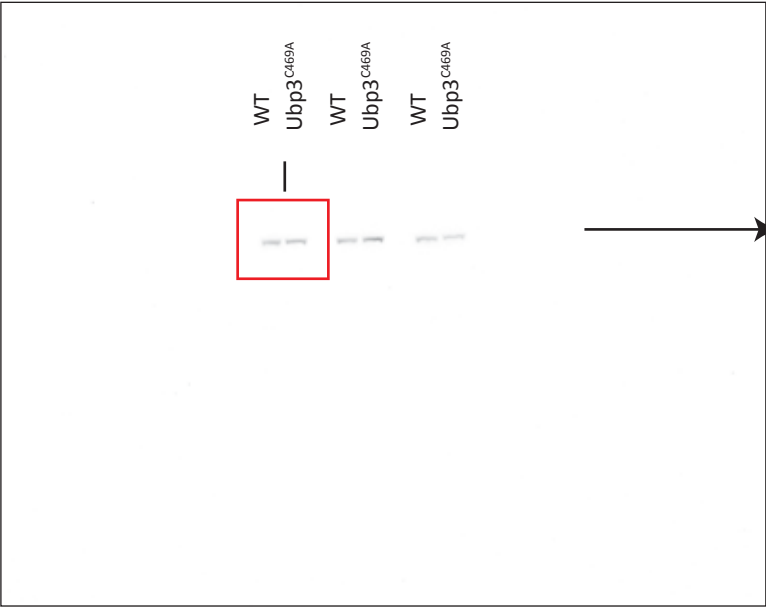

Loading control

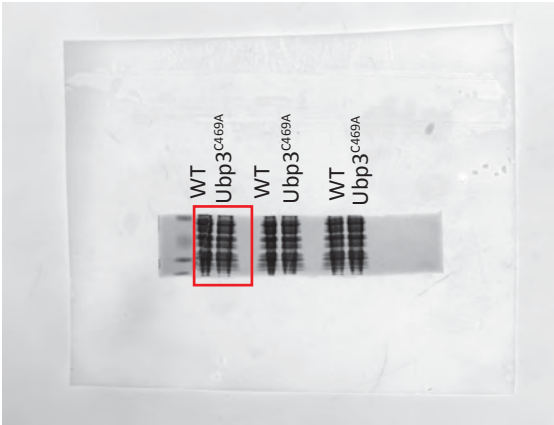

Supplement: fig1-figsupp1-data1 [file elife-90293-fig1-figsupp1-data1-v1.zip]

**Figure 1-figure supplement 1G**-Tom70 levels in WT and *ububp3Δ* *cellsp3Δ* cells

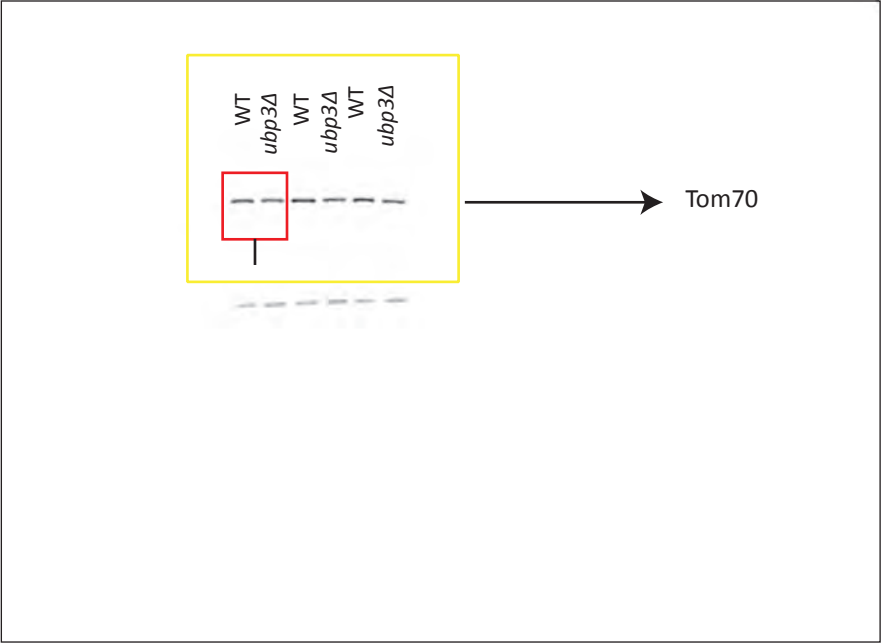

Loading control

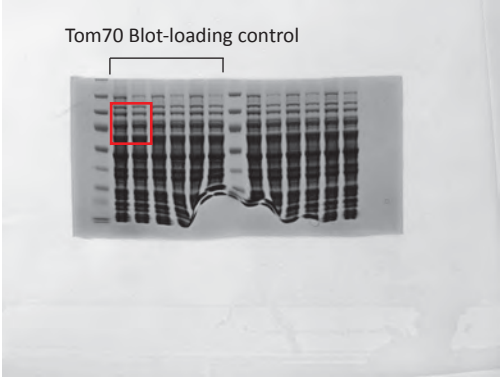

Supplement: fig1-figsupp1-data1 [file elife-90293-fig1-figsupp1-data1-v1.zip]

Figure 1-figure supplement 1J - Total ubiquitination in ubp3 and WT

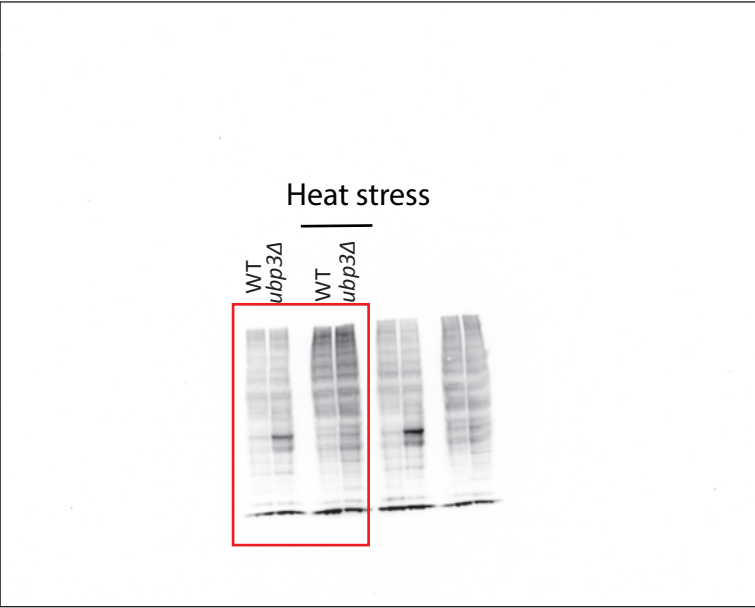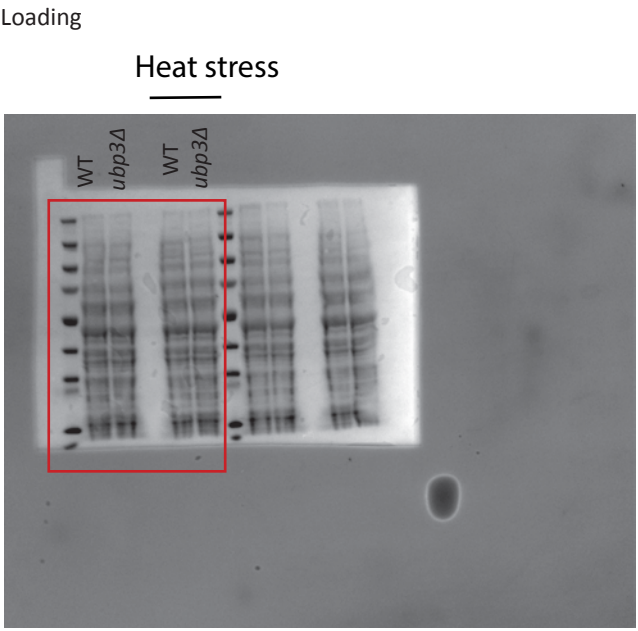

Supplement: fig1-figsupp1-data1 [file elife-90293-fig1-figsupp1-data1-v1.zip]

Figure 2B-Pfk1,Tdh2,Tdh3 in WT and *ubp3Δ*

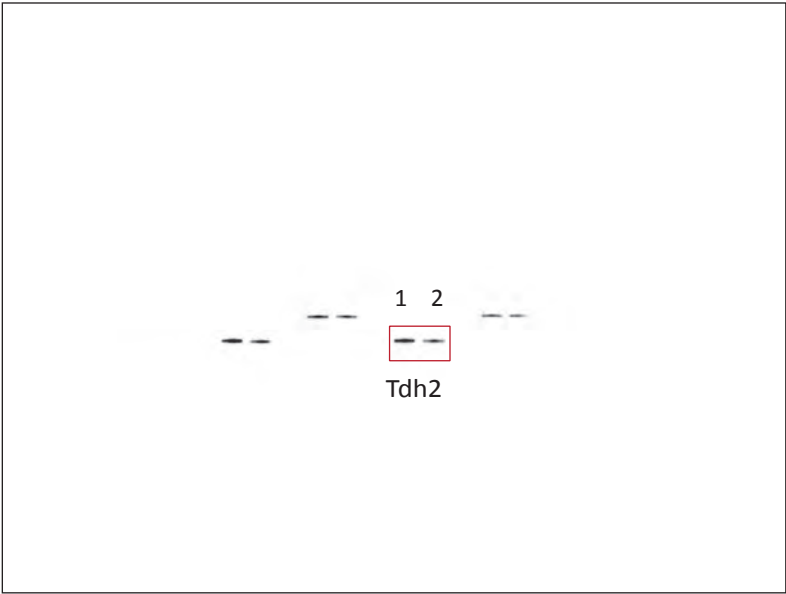

Loading

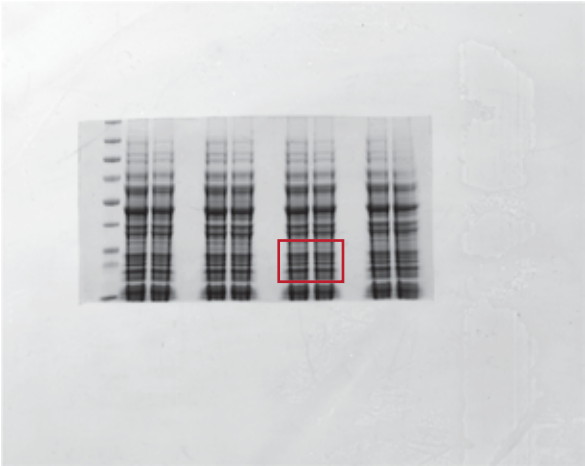

Supplement: fig2-data1 [file elife-90293-fig2-data1-v1.zip]

Figure 2B-Pfk1,Tdh2,Tdh3 in WT and *ubp3Δ*

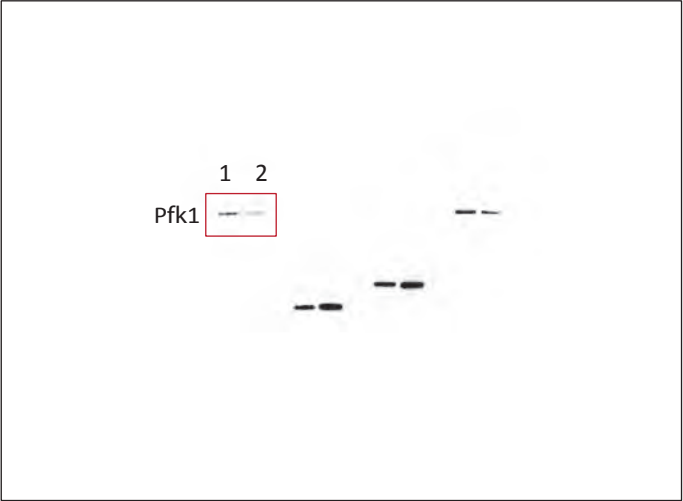

Loading control

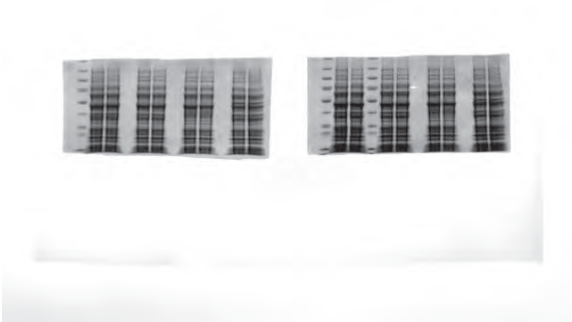

Supplement: fig2-data1 [file elife-90293-fig2-data1-v1.zip]

Figure 2B-Pfk1,Tdh2,Tdh3 in WT and *ubp3Δ*

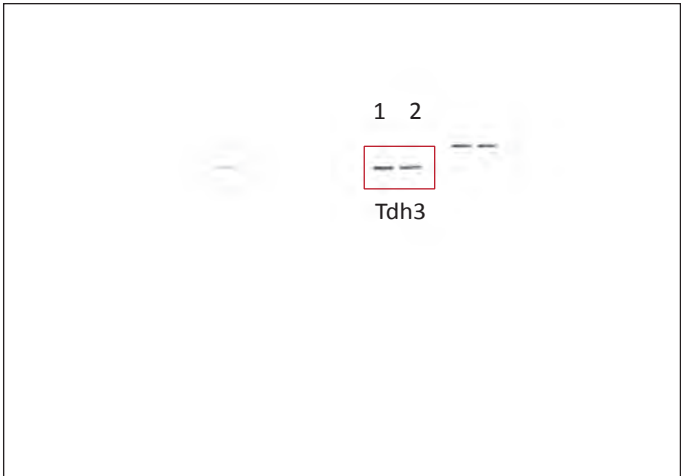

1- WT, 2- *ubp3Δ*

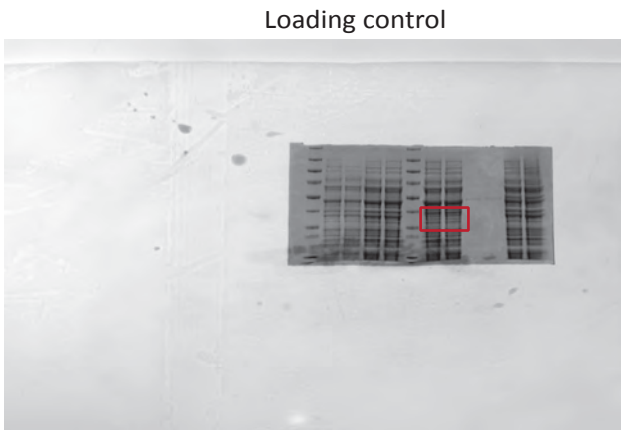

Loading control

Supplement: fig2-data1 [file elife-90293-fig2-data1-v1.zip]

**Figure 3D**-Pho12 and Pho84 levels in WT and *ubp3Δ* cells

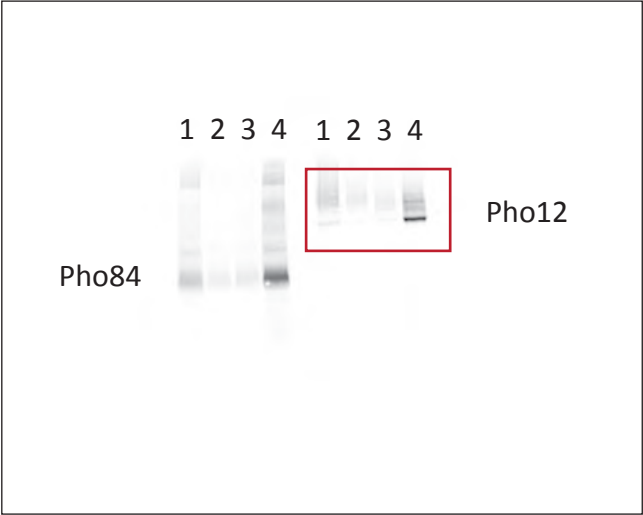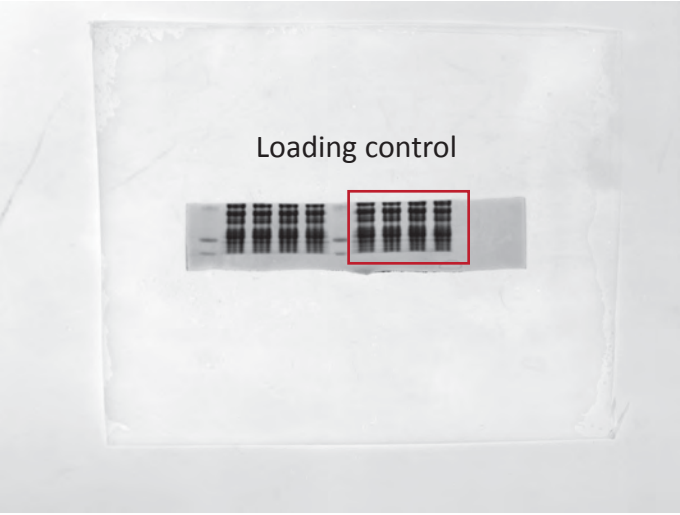

1- WT, 2- WT -High Pi, 3- *ubp3Δ*, 4- *ubp3Δ*- Pi

Supplement: fig3-data1 [file elife-90293-fig3-data1-v1.zip]

**Figure 3D**-Pho12 and Pho84 levels in WT and *ubp3Δ* cells

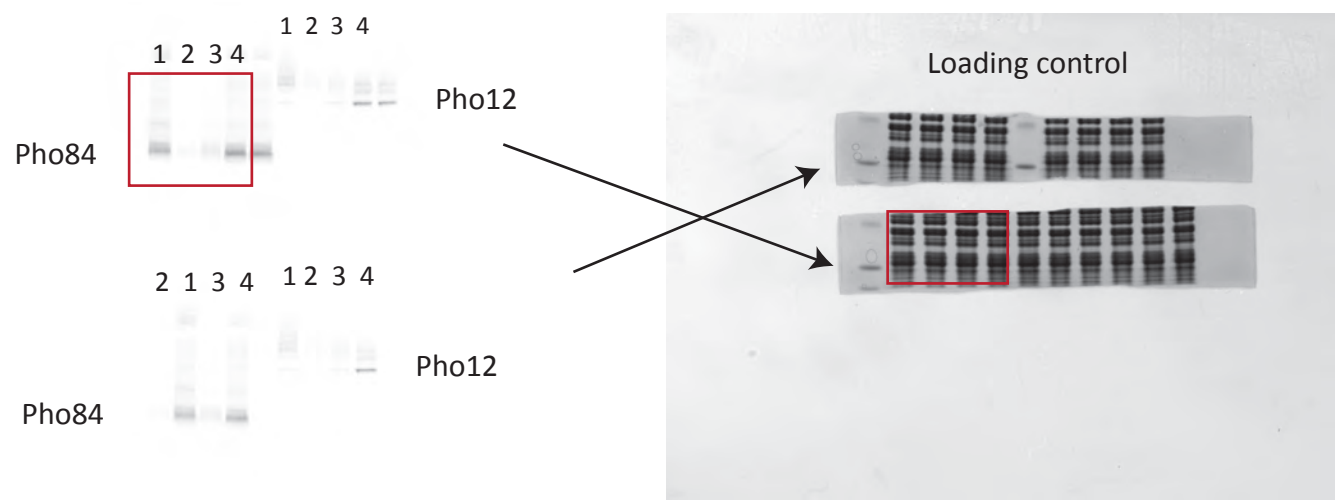

1- WT, 2- WT -High Pi, 3- *ubp3Δ*, 4- *ubp3Δ*- Pi

Supplement: fig3-data1 [file elife-90293-fig3-data1-v1.zip]

Figure 2-figure supplement 1A-Eno1 and Eno2 in WT and *ubp3Δ*

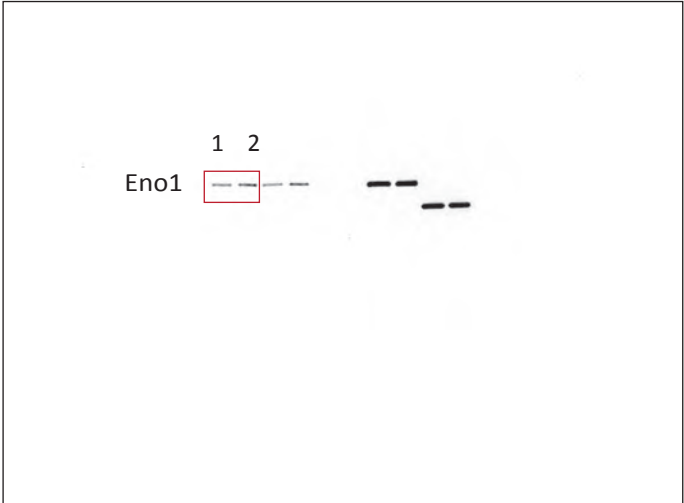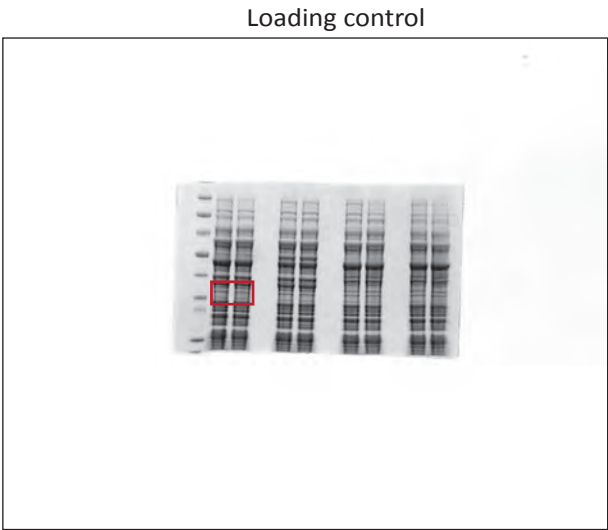

1- WT, 2- *ubp3Δ*

Supplement: fig3-figsupp3-data3 [file elife-90293-fig3-figsupp3-data3-v1.zip]

Figure 2-figure supplement 1A-Eno1 and Eno2 in WT and *ubp3Δ*

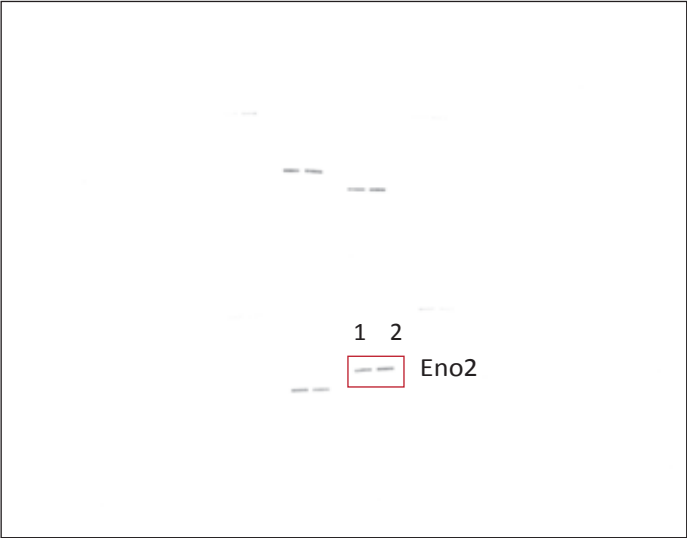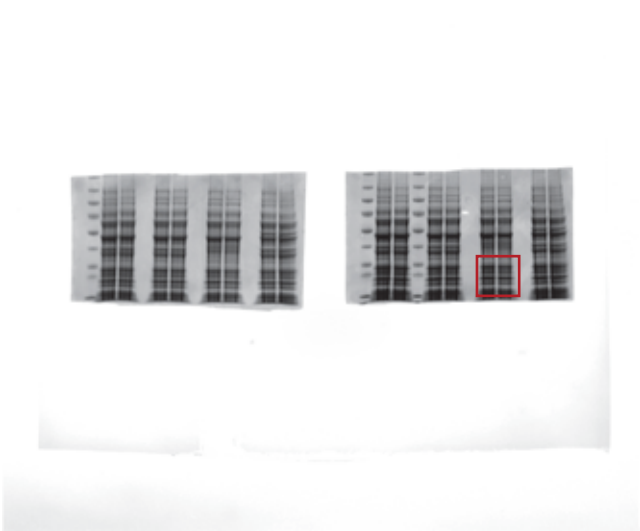

1- WT, 2- *ubp3Δ*

Supplement: fig3-figsupp3-data3 [file elife-90293-fig3-figsupp3-data3-v1.zip]

**Figure 4G** -Cox 2 levels in WT,*ubp3Δ*, *mir1Δ* and *mir1Δubp3Δ* cells

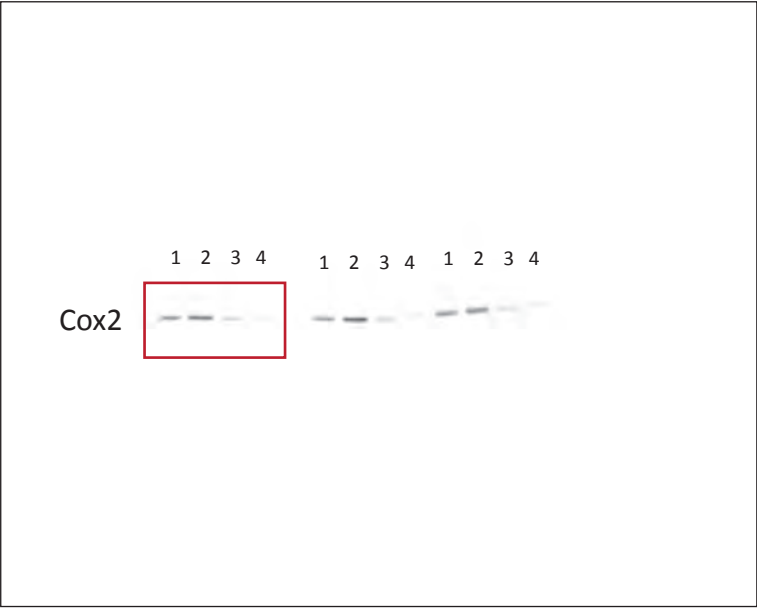

1-WT, 2- *ubp3Δ*, 3 - *mir1Δ*, 4- *mir1Δubp3Δ*

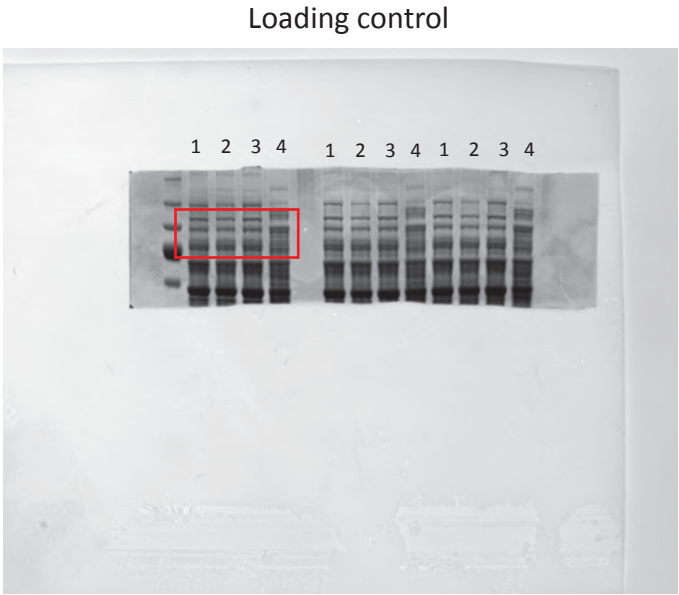

Supplement: fig4-data1 [file elife-90293-fig4-data1-v1.zip]

Figure 5C- Mir1 levels in High and low glucose

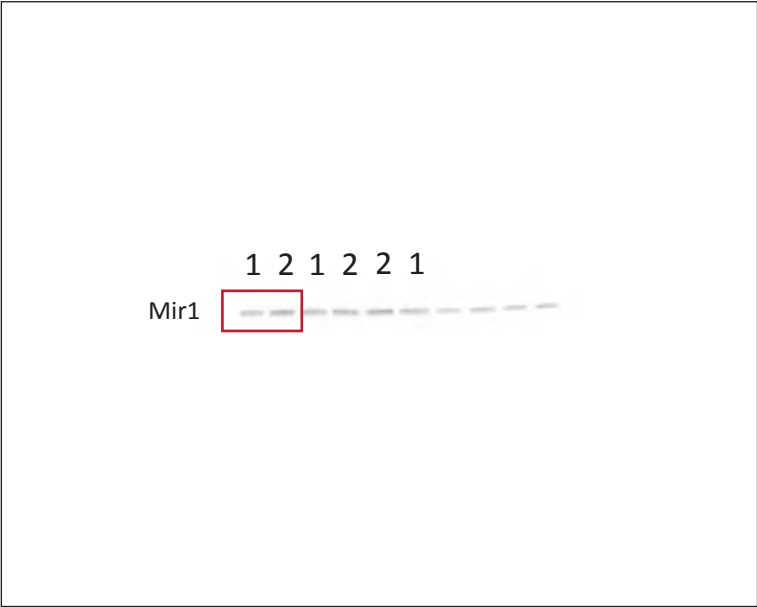

Loading control

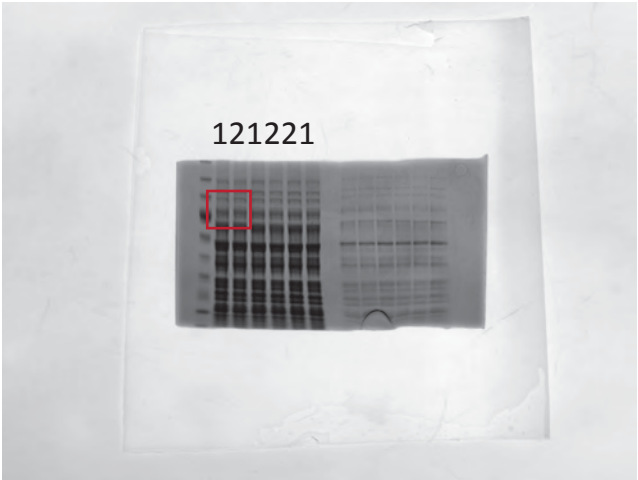

1-2% glc, 2- 0.1% glc

Supplement: fig5-data1 [file elife-90293-fig5-data1-v1.zip]

Figure 5E-Cox2 levels in Mir1 OE

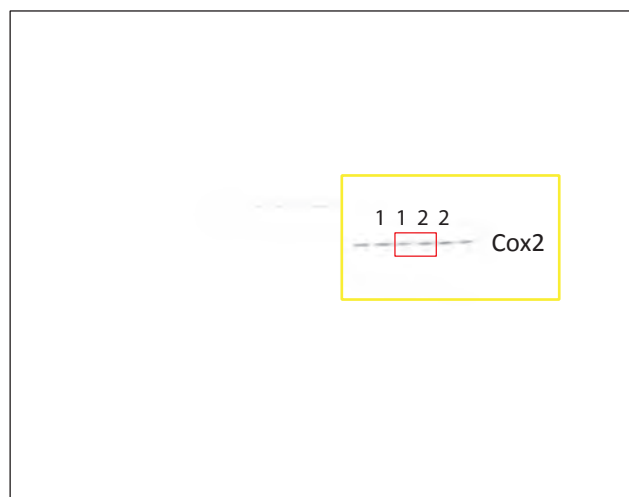

Loading control

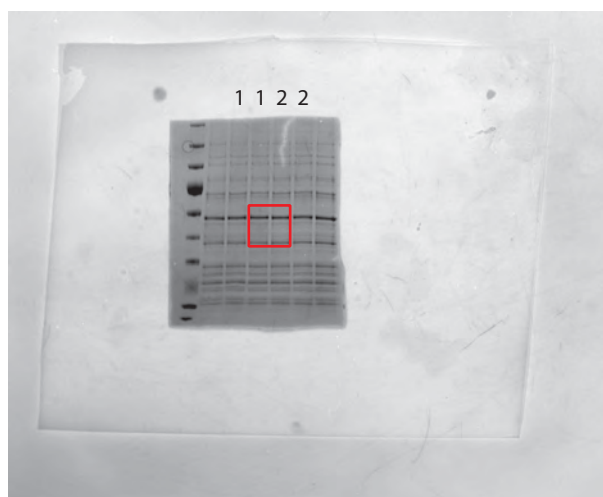

Supplement: fig5-data1 [file elife-90293-fig5-data1-v1.zip]

Figure 5-figure supplement 1G-Mir1 levels in WT and Mir1OE

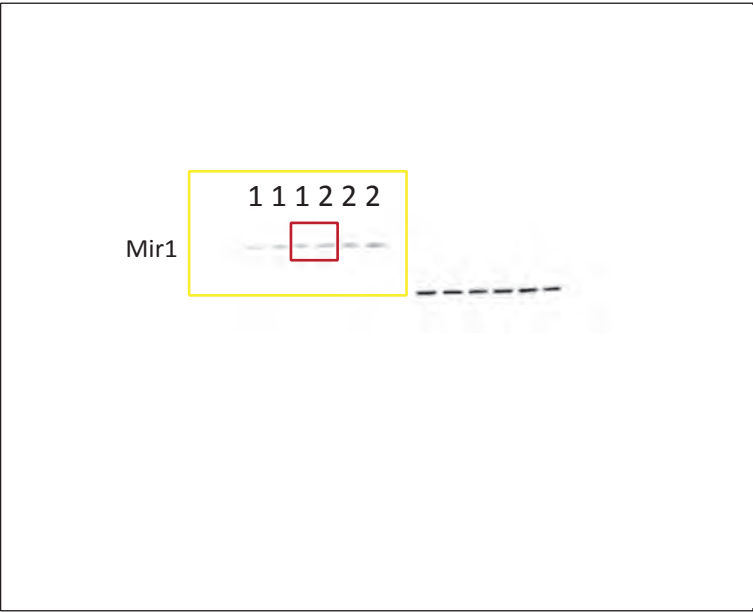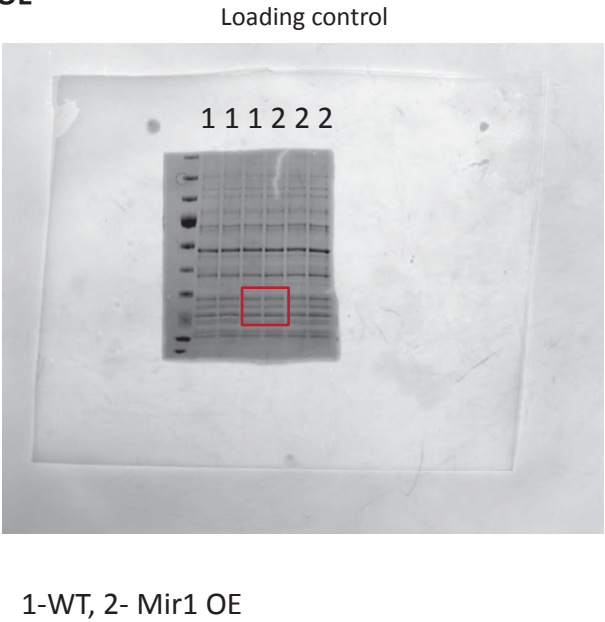

Supplement: fig5-figsupp1-data1 [file elife-90293-fig5-figsupp1-data1-v1.zip]

Figure 5-figure supplement 1H-Mpc3 levels in WT, *ubp3Δ* and *ubp3Δ*-Pi

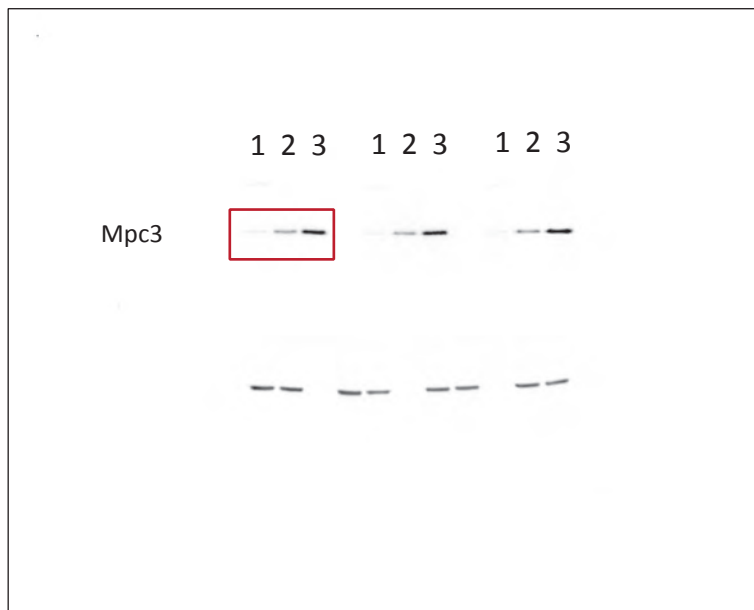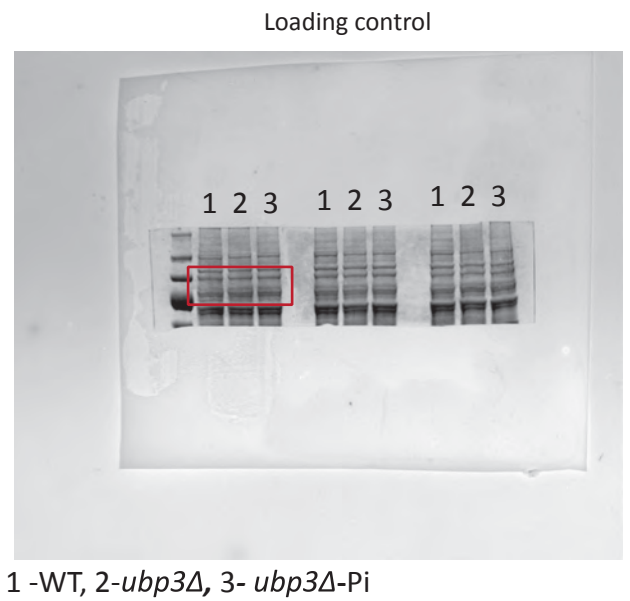

Supplement: fig5-figsupp1-data1 [file elife-90293-fig5-figsupp1-data1-v1.zip]

Figure 5-figure supplement 1I-Mpc3 levels in WT, *mir1Δ*

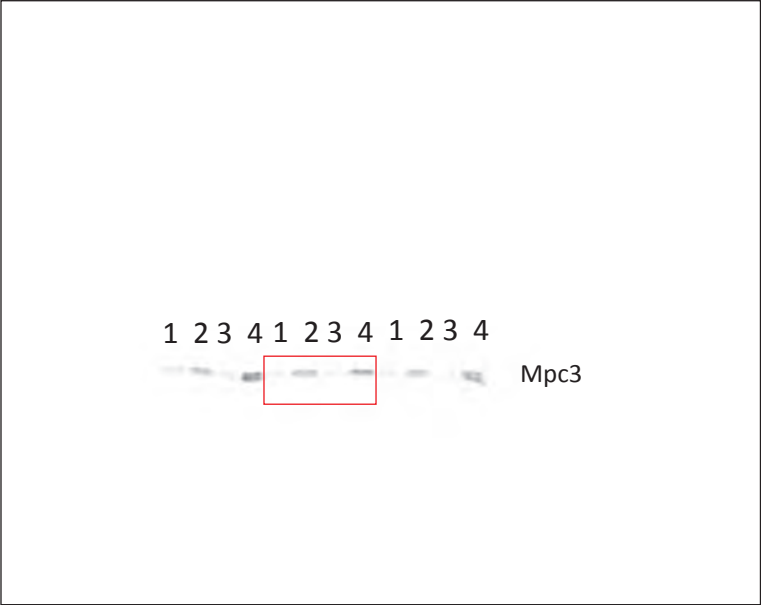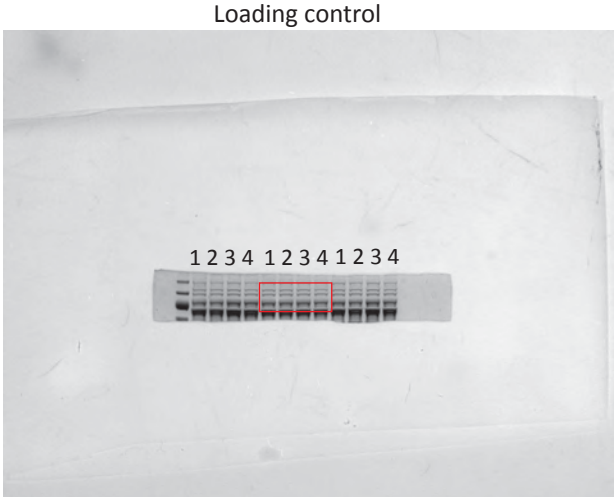

1 -WT 2% glc, 2-WT 0.1 % glc, 3- *mir1Δ* 2%glc,  
4- *mir1Δ* 0.1%glc

Supplement: fig5-figsupp1-data1 [file elife-90293-fig5-figsupp1-data1-v1.zip]

Figure 5-figure supplement 1K-Mpc3 levels in WT, Mir10E

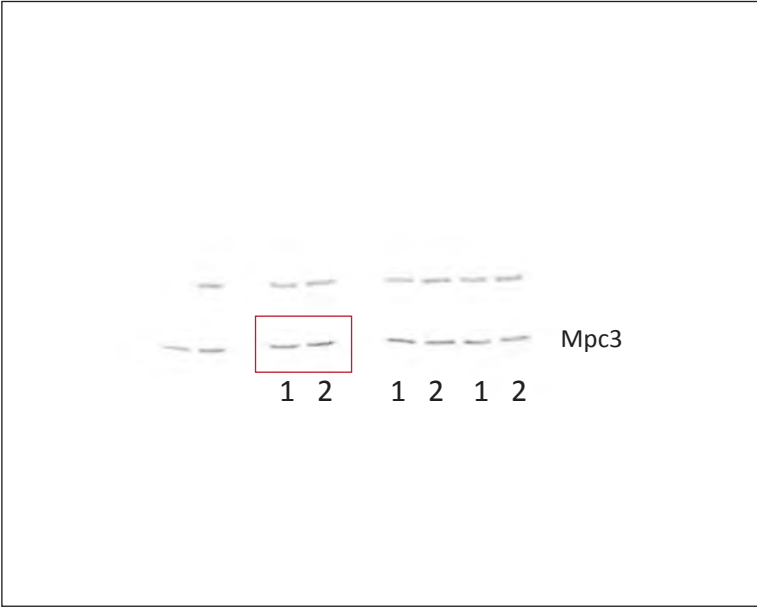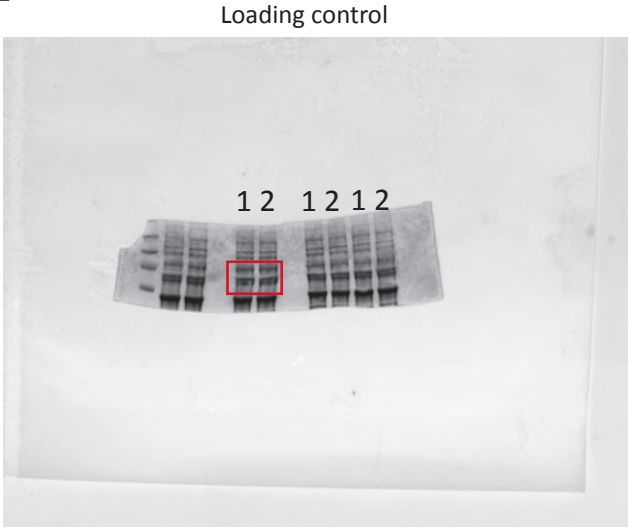

1-WT 2 -Mir10E

Supplement: fig5-figsupp1-data1 [file elife-90293-fig5-figsupp1-data1-v1.zip]

Figure 5-figure supplement 1B-Mir1 levels in glucose and ethanol

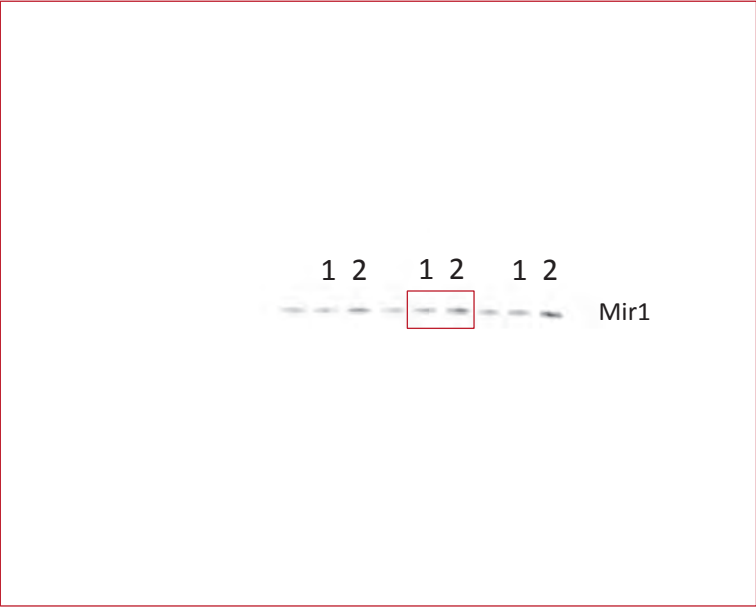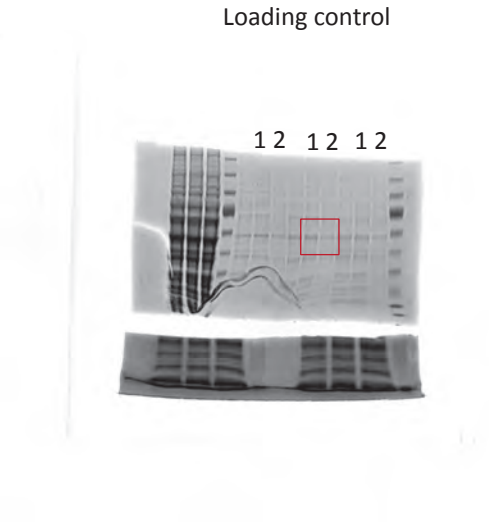

1-glucose 2-ethanol

Supplement: fig5-figsupp1-data1 [file elife-90293-fig5-figsupp1-data1-v1.zip]

Figure 4-Figure supplement 1B - Idh1 in WT, WT+Pi, *ubp3Δ*

Loading control

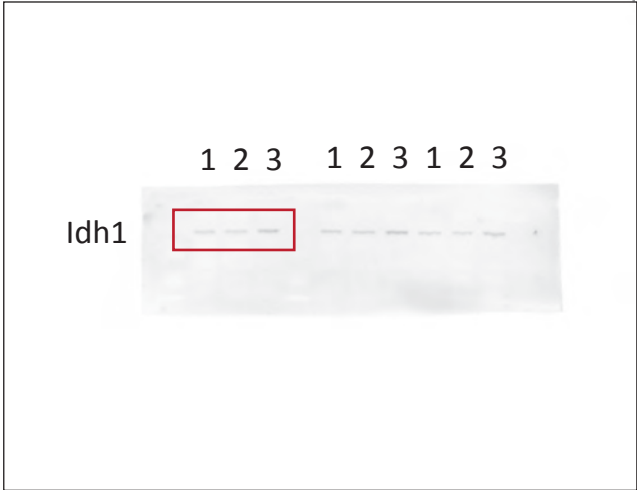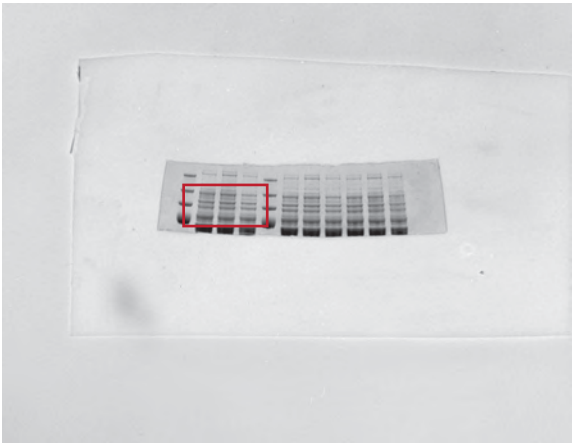

1-WT, 2- WT+Pi, 3- *ubp3Δ*

Supplement: fig5-figsupp5-data5 [file elife-90293-fig5-figsupp5-data5-v1.zip]

Figure 4-figure supplement 1H-Mir1 and Pic2 levels

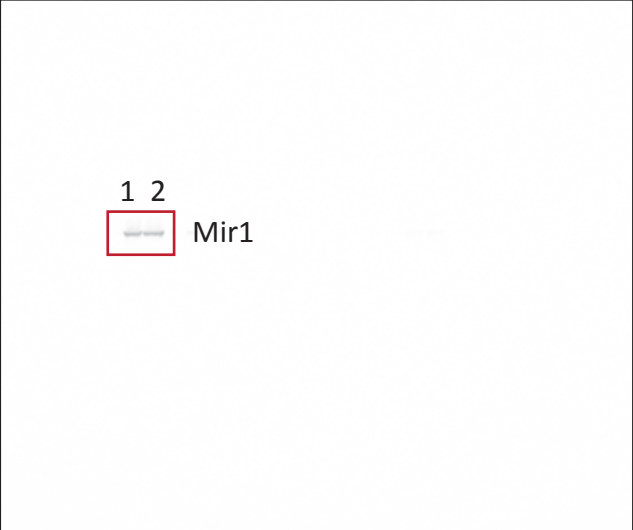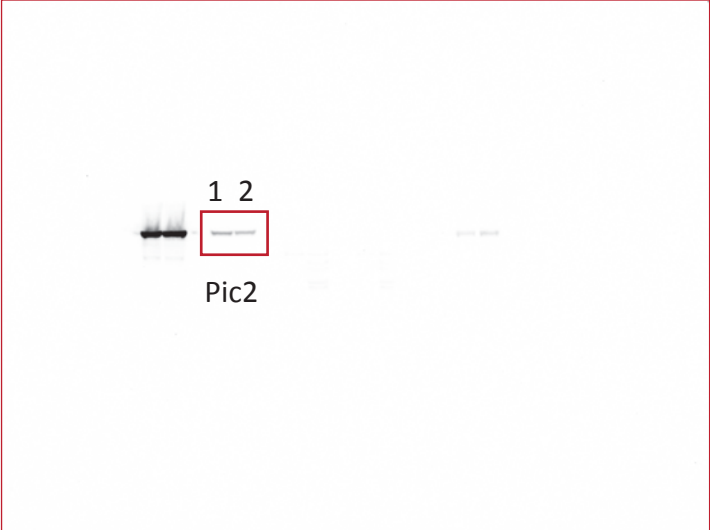

Loading

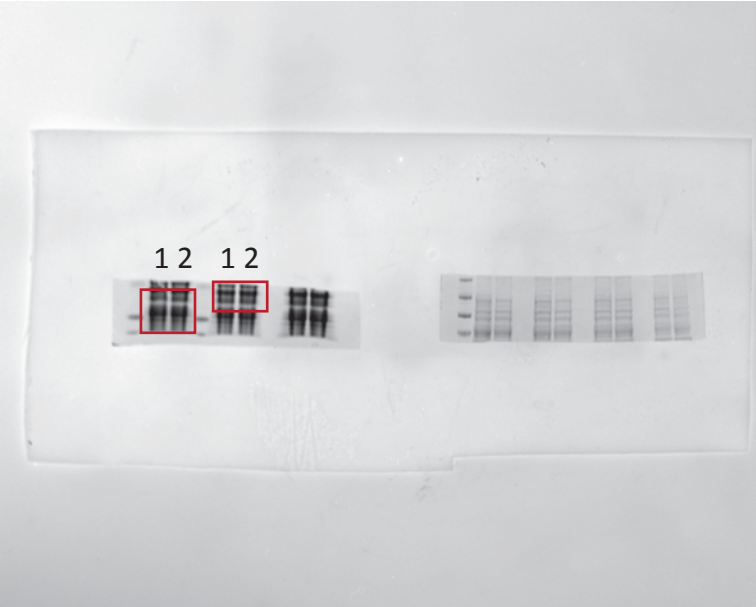

1 - WT  
2-ubp3

Supplement: fig5-figsupp5-data5 [file elife-90293-fig5-figsupp5-data5-v1.zip]

Figure 6B- Cox2 levels in WT vs ubp3Δ

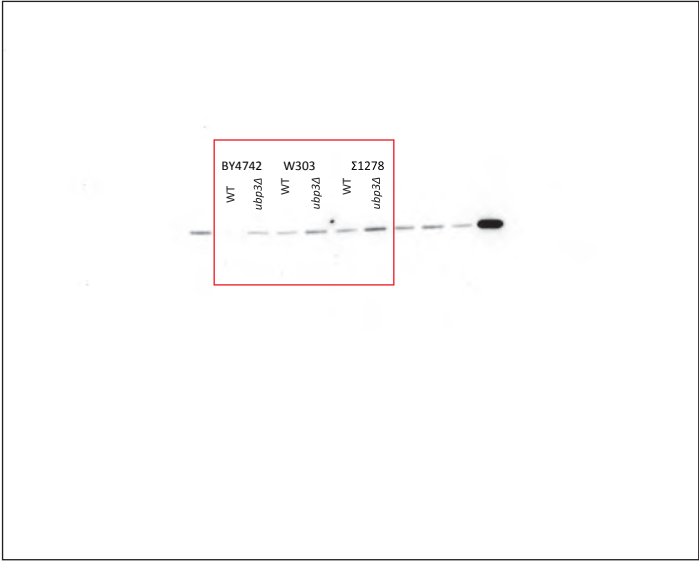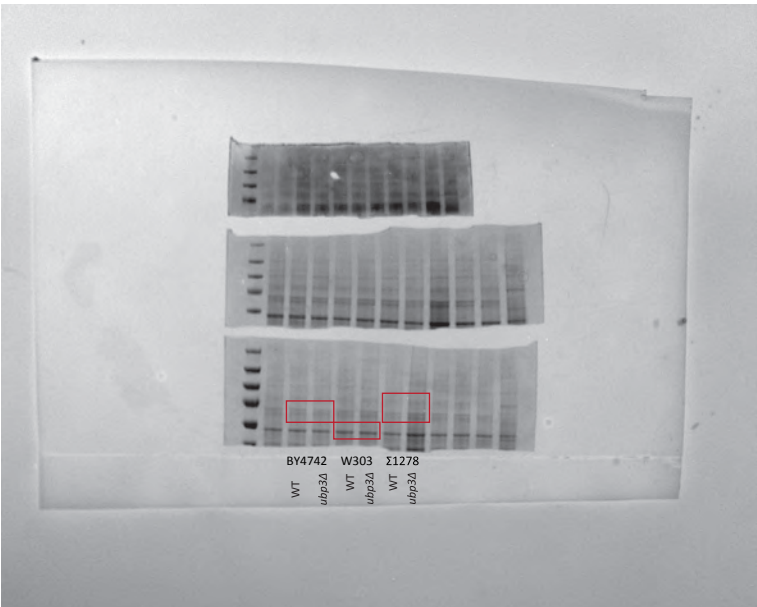

Supplement: fig6-data1 [file elife-90293-fig6-data1-v1.zip]
